# Supplementary material
Source: publisher figshare collection journal article supplement (https://tandf.figshare.com/ndownloader/files/39661958)
Supplement: Supplementary file 1 [file 39661958]

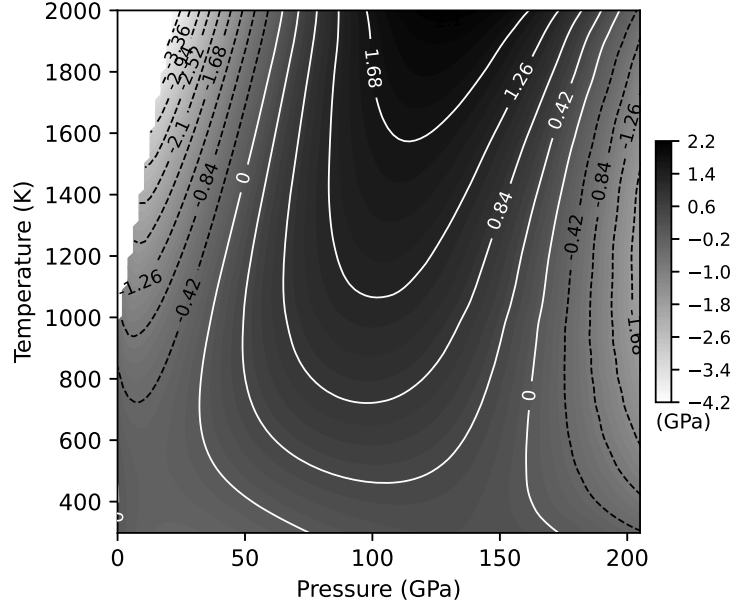

**Figure 11.** Al. The differences in pressures between those calculated by the Sokolova *et al.* thermal EoS for Al, and those calculated by the thermal model in Dioplas using the parameters given in Table 1.

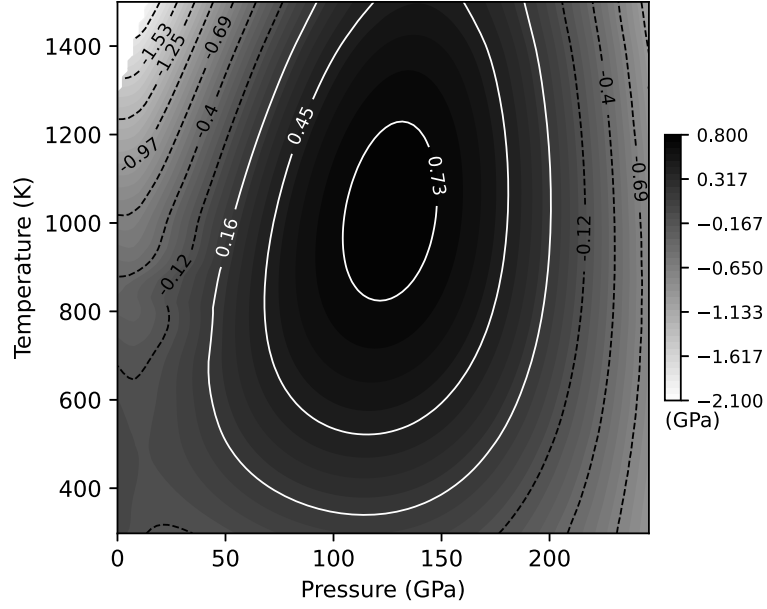

**Figure 12.** Au. The differences in pressures between those calculated by the Sokolova *et al.* thermal EoS for Au, and those calculated by the thermal model in Dioplas using the parameters given in Table 1.

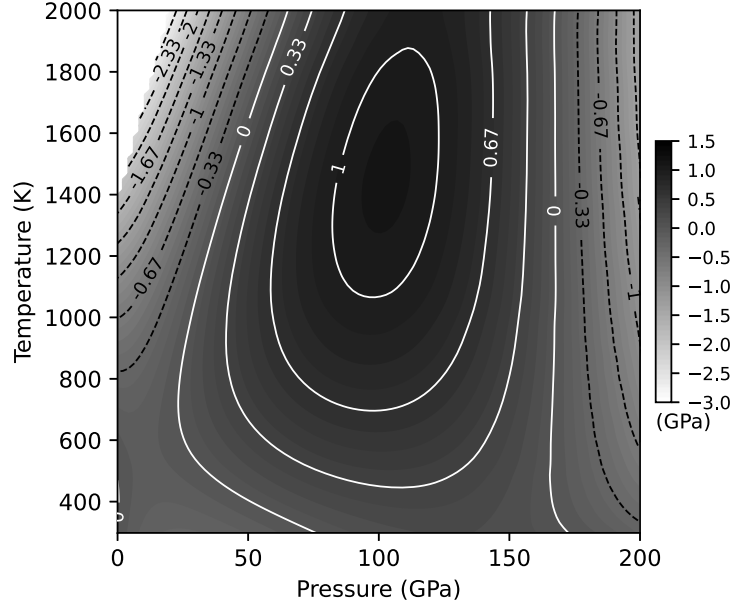

**Figure 13.** Cu. The differences in pressures between those calculated by the Sokolova *et al.* thermal EoS for Cu, and those calculated by the thermal model in Dioplas using the parameters given in Table 1.

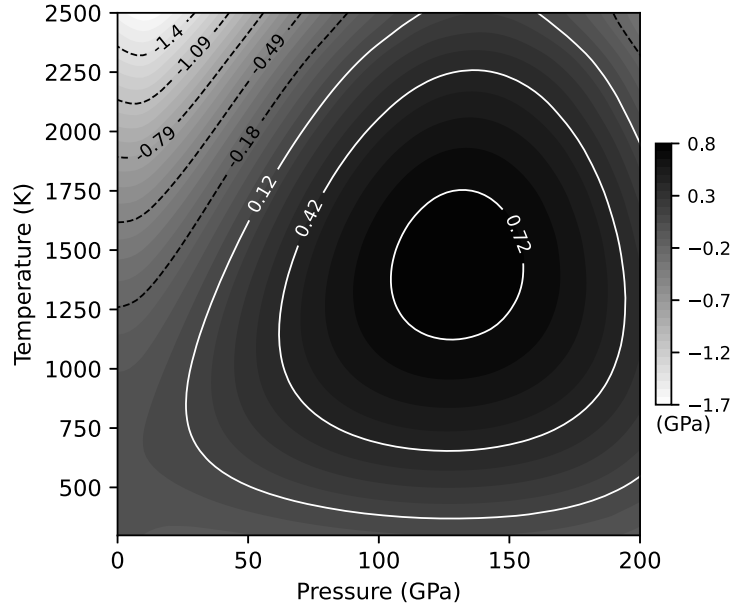

**Figure 14.** Mo. The differences in pressures between those calculated by the Sokolova *et al.* thermal EoS for Mo, and those calculated by the thermal model in Dioplas using the parameters given in Table 1.

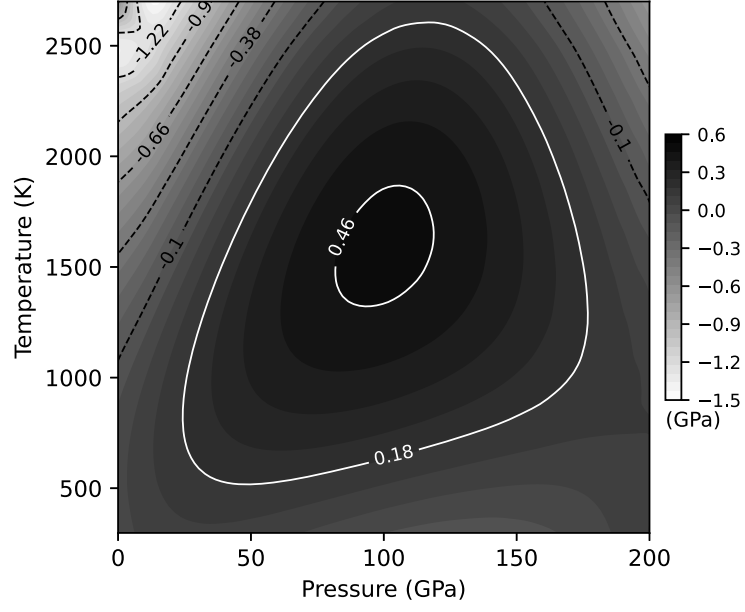

**Figure 15.** Nb. The differences in pressures between those calculated by the Sokolova *et al.* thermal EoS for Nb, and those calculated by the thermal model in Dioplas using the parameters given in Table 1.

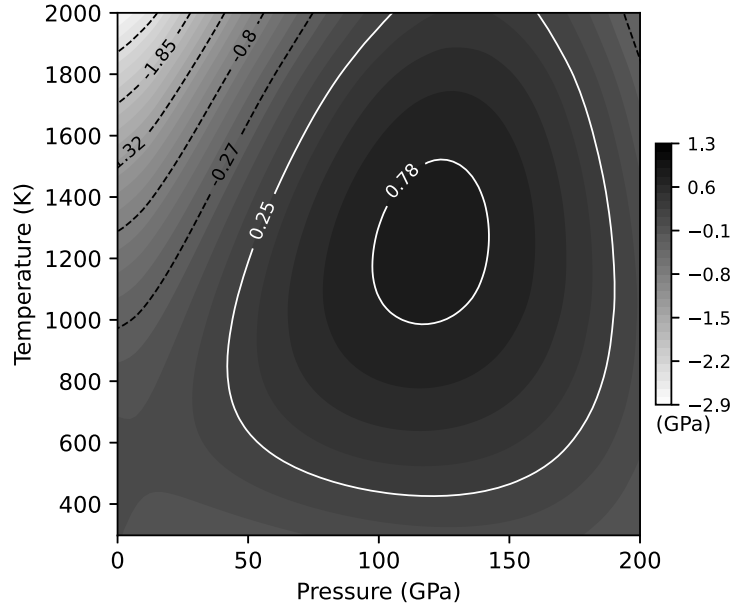

**Figure 16.** Pt. The differences in pressures between those calculated by the Sokolova *et al.* thermal EoS for Pt, and those calculated by the thermal model in Dioplas using the parameters given in Table 1.

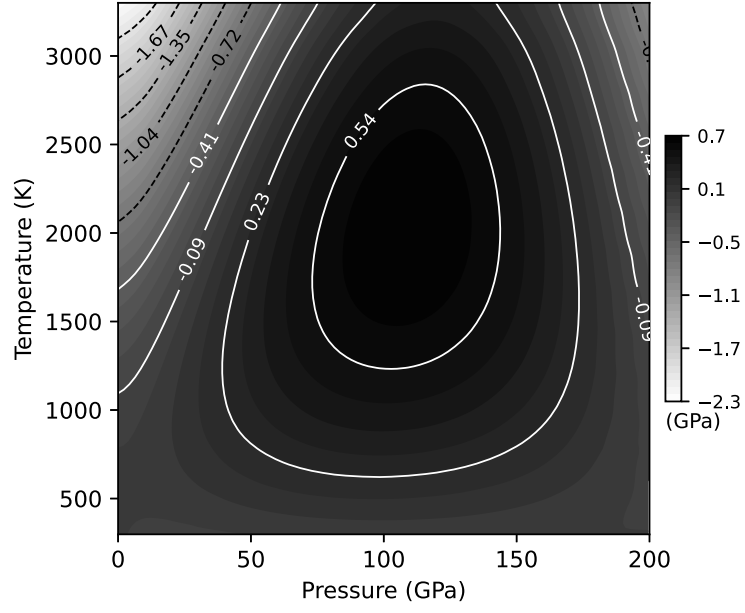

**Figure 17.** Ta. The differences in pressures between those calculated by the Sokolova *et al.* thermal EoS for Ta, and those calculated by the thermal model in Dioplas using the parameters given in Table 1.

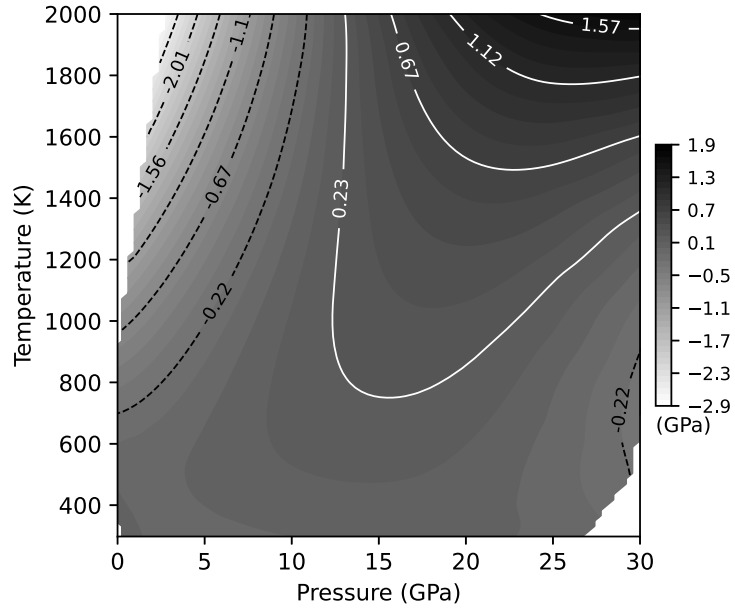

**Figure 18.** NaCl B1. The differences in pressures between those calculated by the Dorogokupets *et al.* thermal EoS for NaCl B1, and those calculated by the thermal model in Dioplas using the parameters given in Table 1.

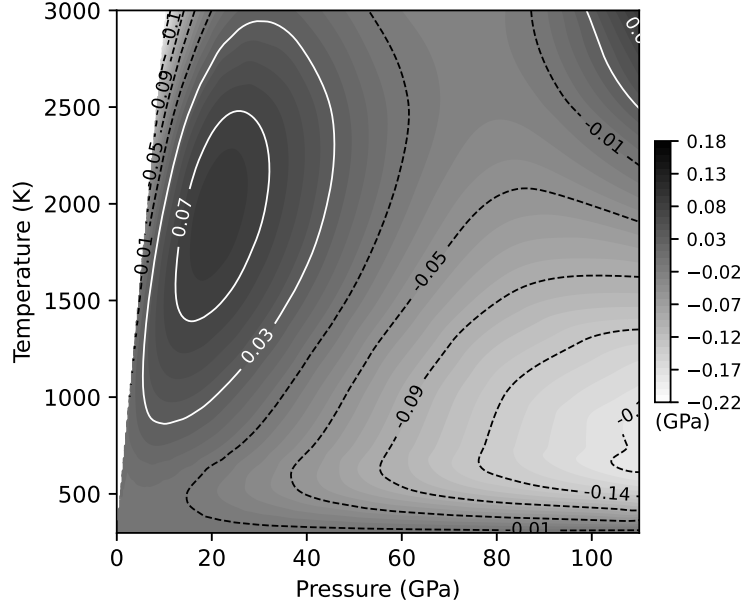

**Figure 19.** NaCl B2. The differences in pressures between those calculated by the Fei *et al.* thermal EoS for NaCl B2, and those calculated by the thermal model in Dioplas using the parameters given in Table 1.

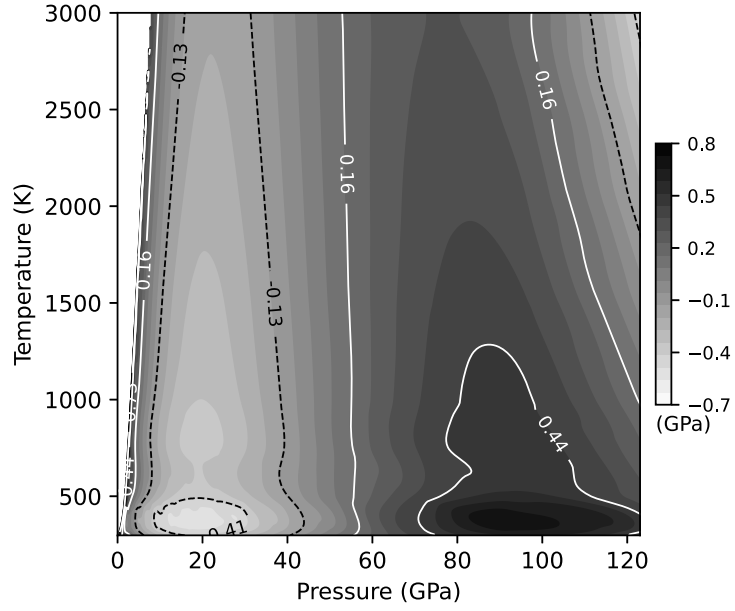

**Figure 20.** KCl B2. The differences in pressures between those calculated by the Dewaele *et al.* thermal EoS for KCl B2, and those calculated by the thermal model in Dioplas using the parameters given in Table 1.

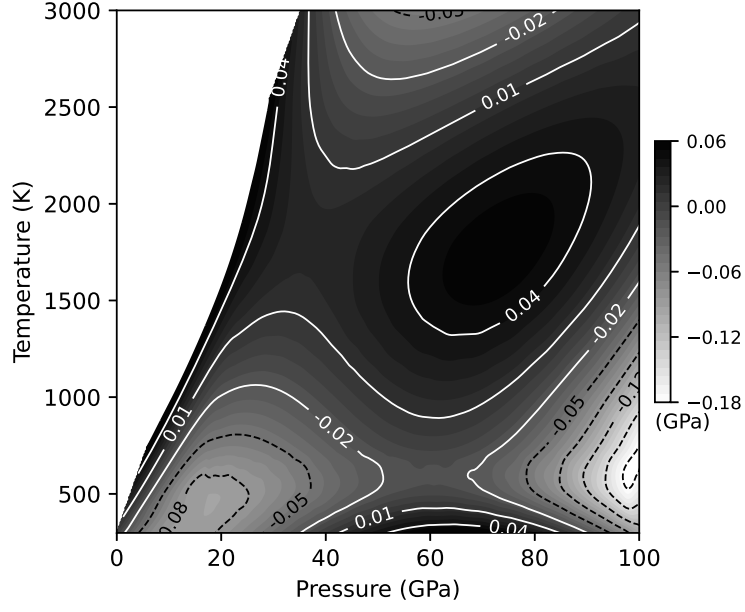

**Figure 21.** hcp-Fe. The differences in pressures between those calculated by the Dorogokupets *et al.* thermal EoS for hcp-Fe, and those calculated by the thermal model in Dioplas using the parameters given in Table 1.

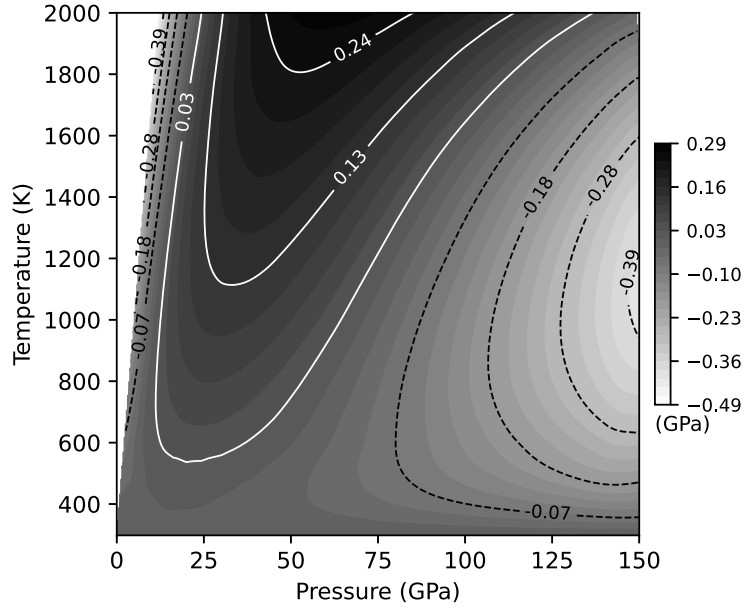

**Figure 22.** Ne. The differences in pressures between those calculated by the Fei *et al.* thermal EoS for Ne, and those calculated by the thermal model in Dioplas using the parameters given in Table 1.
